# Supplementary material for: Dynamic Regulation of H3K27 Trimethylation during Arabidopsis Differentiation
Source: PLoS Genet. 2011 Apr 7;7(4):e1002040. doi: 10.1371/journal.pgen.1002040 (PMC3072373; doi:10.1371/journal.pgen.1002040)
Supplement: Table S6 — Oligonucleotides used for ChIP-qPCR and qRT-PCR analyses. (XLSX) [file pgen.1002040.s017.xlsx]

## Sheet: Tabelle1
Oligonucleotides used for ChIP-qPCR and qRT-PCR:
	(Figure 3)
	FUS3-pA-F (AT3G26790)	GTGGCAAGTGTTGATCATGG
	FUS3-pA-R (AT3G26790)	AGTTGGCACGTGGGAAATAG
	AG-pA-F (AT4G18960)	TGGGTACTGAGAGGAAAGTGAGA
	AG-pA-R (AT4G18960)	GGATCGTAGAAGGCAGACCA
	AG-pK1-F (AT4G18950)	CTCAGATGAGGCCATTGACA
	AG-pK1-R (AT4G18950)	GGCTGCTCAAATCCCAATTA
	ACT-pA-F (AT5G09810)	CCAGGAATTGCTGACCGTAT
	ACT-pA-R (AT5G09810)	GGTGCAACCACCTTGATCTT
	STM-pA-F (AT1G62360)	TAGGACACATCGGACCATCA
	STM-pA-R (AT1G62360)	GAGTGGTTCCAACAGCACTTC
	5´STM-pK1-F	GGCTGACCCGATGTATCTTC
	5´STM-pK1-R	CCTGAAACTGGGACATGGTT
	KNAT2-pA-F (AT1G70510)	TCCAAAATCGCTTCTCATCC
	KNAT2-pA-R (AT1G70510)	AAACACGAAAGCAGCGAGAT
	3´KNAT2-pK1b-F	ATCTTGAATGCAGCAGCACA
	3´KNAT2-pK1b-R	TGTTTTCCCTCTGTTCACGTC
	KNAT6-pA-F (AT1G23380)	GCACGTTGAAACTCTGGAGAC
	KNAT6-pA-R (AT1G23380)	CCCTAATCCCATGGCTAAAA
	5´KNAT6-pK1a-F (AT1G23320)	GGTGGATTGAAGGTGATGCT
	5´KNAT6-pK1a-R (AT1G23320)	GGTGGATTGAAGGTGATGCT
	5´KNAT6-pK2-F (AT1G23320)	GAGGAACGCTACATCGTGGT
	5´KNAT6-K2-R (AT1G23320)	GAGCGATGAAAGTGCAAACA
	SAW1-pA-F (AT4G36870)	CGCCATGCAGTTATTCTTGA
	SAW1-pA-R (AT4G36870)	AGAATTGTGGTGGCTCCTTG
	TCP2-pA-F (AT4G18390)	CGATGACGAGAATCACCAGA
	TCP2-pA-R (AT4G18390)	TTGCTCGTGTCTGAATTGCT
	TCP10-pA-F (AT2G31070)	ACAGGACTGAGCTGCCTGAT
	TCP10-pA-R (AT2G31070)	CGCAGAATTGTCGTTTTCAG
	PIN1-pA-F (AT1G73590)	CGTCGTTCTAATGCTTCAAGG
	PIN1-pA-R (AT1G73590)	GCGTTGGTTAGATTCGAAGG
	5´PIN1-pK1-F	AACAAAATCGCTCGAACTCA
	5´PIN1-pK1-R	CGTTGTCGCCAAAGTTTCAT
	PIN4-pA-F (AT2G01420)	CCGTTCAATCTTCTCGTGGT
	PIN4-pA-R (AT2G01420)	CCATATTTAACGGCGTTGTTC
	3´PIN4-pK1-F	CCAAATCCAAAGGATCATCA
	3´PIN4-pK1-R	TTCACTCCTCGAACACATCCT
	PIN7-pA-F (AT1G23080)	CGGTGTAACTCCACAGCAGA
	PIN7-pA-R (AT1G23080)	CGCTGGTGGCATATGTTTTA
	PIN8-pA-F (AT5G15100)	ATTCTGGCATCCAACAGGAG
	PIN8-pA-R (AT5G15100)	TGGCATTCCAAGAATGAGAG
	UGT85A1-pA (AT1G22370)	CCAAGCTTTATCCGTGCAAC
	UGT85A1-pA (AT1G22370)	TAGAACGGACGACATCATGC
	CSLA10-pA-F (AT1G24070)	GATGGCATGACCGGACTACT
	CSLA10-pA-R (AT1G24070)	AGACAAATTTCCAGCCGAGA
	mir319a-pA-F (AT4G23713)	CGAGTCGCCAAAATTCAAAC
	mir319a-pA-R (AT4G23713)	GCTCCCTTCAGTCCAATCAA
	mir167a-pA-F (AT3G22886)	TGTTGTGTTTCATGACGATGG
	mir167a-pA-R (AT3G22886)	AGAAGGGTGCGACAGTCAAC
	mir167d-pA-F (AT1G31173)	GCTTCACAAGGAGGCATTTC
	mir167d-pA-R (AT1G31173)	TGGCAGCTTCAGCTTCTAAA
	(Figure 7)
	RT-AT5G60390-F (AT5G60390)	TGAGCACGCTCTTCTTGCTTTCA
	RT-AT5G60390-R (AT5G60390)	GGTGGTGGCATCCATCTTGTTACA
	RT-KNAT2-F (AT1G70510)	CGCGGTCATTGCTTCTTTGTTGG
	RT-KNAT2-R (AT1G70510)	GCTCTTTCAGATGATGGTGCGGTT
	RT-KNAT6-F (AT1G23380)	GTGGCCTTACCCTACTGAAGGAGA
	RT-KNAT6-R (AT1G23380)	TTTTGGTCTAACCCCGTTGCATCA
	RT-STM-F (AT1G62360)	AATTGTCAGAAGGTTGGAGC
	RT-STM-R (AT1G62360)	CGTTGAAGGAAGACCATAGC
	RT-AG-F (AT4G18960)	ATCCGATCCAAGAAGAATGAG
	RT-AG-R (AT4G18960)	TTTCAGCTATCTTTGCACGA
	RT-PIN1-F (AT1G73590)	GGAAACTTATTCGTAATCCCAACTCT
	RT-PIN1-R (AT1G73590)	CAATGTTCCACTTGAAGGAAATGAG
	RT-FUS3-F (AT3G26790)	CCTTCAAGTATAGGTACTGGC
	RT-FUS3-R (AT3G26790)	CTTGGTAAACCATGATGAAGTC
	RT-mir319A-F (AT4G23713)	CGAGTCGCCAAAATTCAAAC
	RT-mir319A-R (AT4G23713)	GCTCCCTTCAGTCCAATCAA
	RT-TCP2-F (AT4G18390)	GGTGGCATCACAATTCTTCC
	RT-TCP2-R (AT4G18390)	ACGGTCACGTGGTCCTTTAG
	RT-TCP4-F (AT3G15030)	TCCTCTGCTTCCTCTATTTCTC
	RT-TCP4-R (AT3G15030)	CCATTGACTACACAAACCGA
	RT-TCP10-F (AT2G31070)	AGCAAGTGGGCAACAAAAAC
	RT-TCP10-R (AT2G31070)	ACCGCCTTGAACCTCAACTA
	RT-TCP5-F (AT5G60970)	TTCCTCCTTCTTCTACTTCTC
	RT-TCP5-R (AT5G60970)	ATCTCCTCTTCATCACATTCTC
	RT-SPL3-F (AT2G33810)	AGAGGCTTTGGAGAAGAAGCAGAAAGG
	RT-SPL3-R (AT2G33810)	GAAGACCAGAGATCCGAACATGAGGAG
	RT-SPL5-F (AT3G15270)	CCAGACTCAAGAAAGAAACAGGGTAGACAG
	RT-SPL5-R (AT3G15270)	TCCGTGTAGGATTTAATACCATGACC
	RT-SPL9-F (AT2G42200)	CAAGGTTCAGTTGGTGGAGGA
	RT-SPL9-R (AT2G42200)	TGAAGAAGCTCGCCATGTATTG
	(Figure 8)
	RT-TE1-F (AT3G28400)	GCCTACCTTTAGATGTTAAGAC
	RT-TE1-R (AT3G28400)	TATACTGTTTATCCTCAGCCTC
	RT-TE2-F (AT3G21020)	GATCCATCGAAGGTTCCAGA
	RT-TE2-R (AT3G21020)	GGAGCGCTTTCATGTCTTTC
	RT-TE3-F (AT3G21040)	CGAGACTGGTGGAGAATGGT
	RT-TE3-R (AT3G21040)	TTCCTGAAAACCGAATCTGG
	RT-TE4-F (AT3G43690)	AGGTTTGCTGTGGAAATTGG
	RT-TE4-R (AT3G43690)	GATTTGGGTAAGCCAGACGA
	RT-TE5-F (AT4G02960)	AACTTGCGCTTCTTGGAAAA
	RT-TE5-R (AT4G02960)	GACCTCTGCCGAGTTCAAAG
	(Figure S1)
	ACT-pATG-F (AT5G09810)	TAGTGAAAAATGGCCGATGG
	ACT-pATG-R (AT5G09810)	CCATTCCAGTTCCATTGTCA
	KNAT2-pATG-F (AT1G70510)	AGGCTAGGGATCGAAGAAGC
	KNAT2-pATG-R (AT1G70510)	GAGCGGAAACCACACATTCT
	KNAT6-pATG-F (AT1G23380)	GCGATTTAGAAGACGGAGGA
	KNAT6-pATG-R (AT1G23380)	GAATAATCACCGGCCGAAT
	PIN1-pATG-F (AT1G73590)	TTCCCTCTTCACCACTTCTCTC
	PIN1-pATG-R (AT1G73590)	CCGCCGTAATCATCTTTTGT
	PIN4-pATG-F (AT2G01420)	CCCTCAAATGCCACTGTCTT
	PIN4-pATG-R (AT2G01420)	CAAGTCGTGCCACGTAATCA
	PIN7-pATG-F (AT1G23080)	CCGGCGAACAACAATATGAT
	PIN7-pATG-R (AT1G23080)	CGTGAGGACGGTGTAGAGGT
	(Figure S6)
	PIN6-pA-F (AT1G77110)	GGTCCAACTCGTTGTTCTTCA
	PIN6-pA-R (AT1G77110)	TGAGGTTTTCTAATCAATCACAGG
	UFO-pA-F (AT1G30950)	CACCAATATCAAGGCCAAGG
	UFO-pA-R (AT1G30950)	GCGTCGACATGGAAACTCTC
	5´UFO-pK1-F	TGCTGCTTCACGGAAGACTA
	5´UFO-pK1-R	CTACGAATGGCTGATCTCCAC
	LFY-pA-F (AT5G61850)	CTTTCGTTGGGAGCTTCTTG
	LFY-pA-R (AT5G61850)	GTTGGGTTCCACCGGAATA
	5´LFY-pK1-F	ATCGAGCTGCGTTTTGATCT
	5´LFY-pK1-R	CTCACCTGAAATTCGCTCAGT
	(Figure S7)
	RT-PIN2-F (AT5G57090)	CTCGCCGCACTCTTTCTTT
	RT-PIN2-R (AT5G57090)	GGATTCCCATTACCAACGTG
	RT-PIN3-F (AT1G70940)	TTCTATCTGATGCTGGTCTTGG
	RT-PIN3-R (AT1G70940)	CCACAAGCGATTAATTTGGGT
	RT-PIN4-F (AT2G01420)	CCTCTCCACTATCAAGACCG
	RT-PIN4-R (AT2G01420)	GCTAAGGAGATTCGGATGGT
	RT-PIN5-F (AT5G16530)	ATTTCTAACAGATGGCATCTGG
	RT-PIN5-R (AT5G16530)	TCCGGCAATAAACTTCAATACC
	RT-PIN6-F (AT1G77110)	CTTCTTGTCGGATTAAGAGGT
	RT-PIN6-R (AT1G77110)	CCCAAAGATAACCAATGTACTG
	RT-PIN7-F (AT1G23080)	CGGTGAGATTCTTTACTGGAC
	RT-PIN7-R (AT1G23080)	CAATGCAGCTTGAACAATGG
	RT-PIN8-F (AT5G15100)	TAGAACATACAGGCAATGACC
	RT-PIN8-R (AT5G15100)	CATCTCAGGCAAATTCCATCC

## Sheet: Tabelle2
RTSPL3F	AGAGGCTTTGGAGAAGAAGCAGAAAGG
RTSPL3R	GAAGACCAGAGATCCGAACATGAGGAG
RTSPL5F	CCAGACTCAAGAAAGAAACAGGGTAGACAG
RTSPL5R	TCCGTGTAGGATTTAATACCATGACC
RTSPL9F	CAAGGTTCAGTTGGTGGAGGA
RTSPL9R	TGAAGAAGCTCGCCATGTATTG
(Figure 8)
RTTE1F (AT3G28400)	GCCTACCTTTAGATGTTAAGAC
RTTE1R (AT3G28400)	TATACTGTTTATCCTCAGCCTC
RTTE2F (AT3G21020)	GATCCATCGAAGGTTCCAGA
RTTE2R (AT3G21020)	GGAGCGCTTTCATGTCTTTC
RTTE3F (AT3G21040)	CGAGACTGGTGGAGAATGGT
RTTE3R (AT3G21040)	TTCCTGAAAACCGAATCTGG
RTTE4F (AT3G43690)	AGGTTTGCTGTGGAAATTGG
RTTE4R (AT3G43690)	GATTTGGGTAAGCCAGACGA
RTTE5F (AT4G02960)	AACTTGCGCTTCTTGGAAAA
RTTE5R (AT4G02960)	GACCTCTGCCGAGTTCAAAG
(Figure S11)
RTPIN2F	CTCGCCGCACTCTTTCTTT
RTPIN2R	GGATTCCCATTACCAACGTG
RTPIN3F	TTCTATCTGATGCTGGTCTTGG
RTPIN3R	CCACAAGCGATTAATTTGGGT
RTPIN4F	CCTCTCCACTATCAAGACCG
RTPIN4R	GCTAAGGAGATTCGGATGGT
RTPIN5F	ATTTCTAACAGATGGCATCTGG
RTPIN5R	TCCGGCAATAAACTTCAATACC
RTPIN6F
RTPIN6R
RTPIN7F
RTPIN7R
RTPIN8F	TAGAACATACAGGCAATGACC
RTPIN8R	CATCTCAGGCAAATTCCATCC
PIN6RTF	CTTCTTGTCGGATTAAGAGGT
PIN6RTR	CCCAAAGATAACCAATGTACTG
